# Supplementary material for: Genomic and healthcare dynamics of nosocomial SARS-CoV-2 transmission
Source: eLife journal article supplement (doi:10.7554/elife.65453), 2021-03-17
Supplement: supp [file elife-65453-supp-v1.zip]

Archive with 5 entries (5 files):
- elife_poa_e65453_Figure_1_figure_supplement_1.pdf
- elife_poa_e65453_Figure_1_figure_supplement_2.pdf
- elife_poa_e65453_Figure_1_figure_supplement_3.pdf
- elife_poa_e65453_Figure_1_figure_supplement_4.pdf
- elife_poa_e65453_Transparent_Reporting_File.pdf
