# Supplementary figures and images for: Genomic and healthcare dynamics of nosocomial SARS-CoV-2 transmission
Source: eLife journal article supplement (doi:10.7554/elife.65453), 2021-03-17

3-7 days

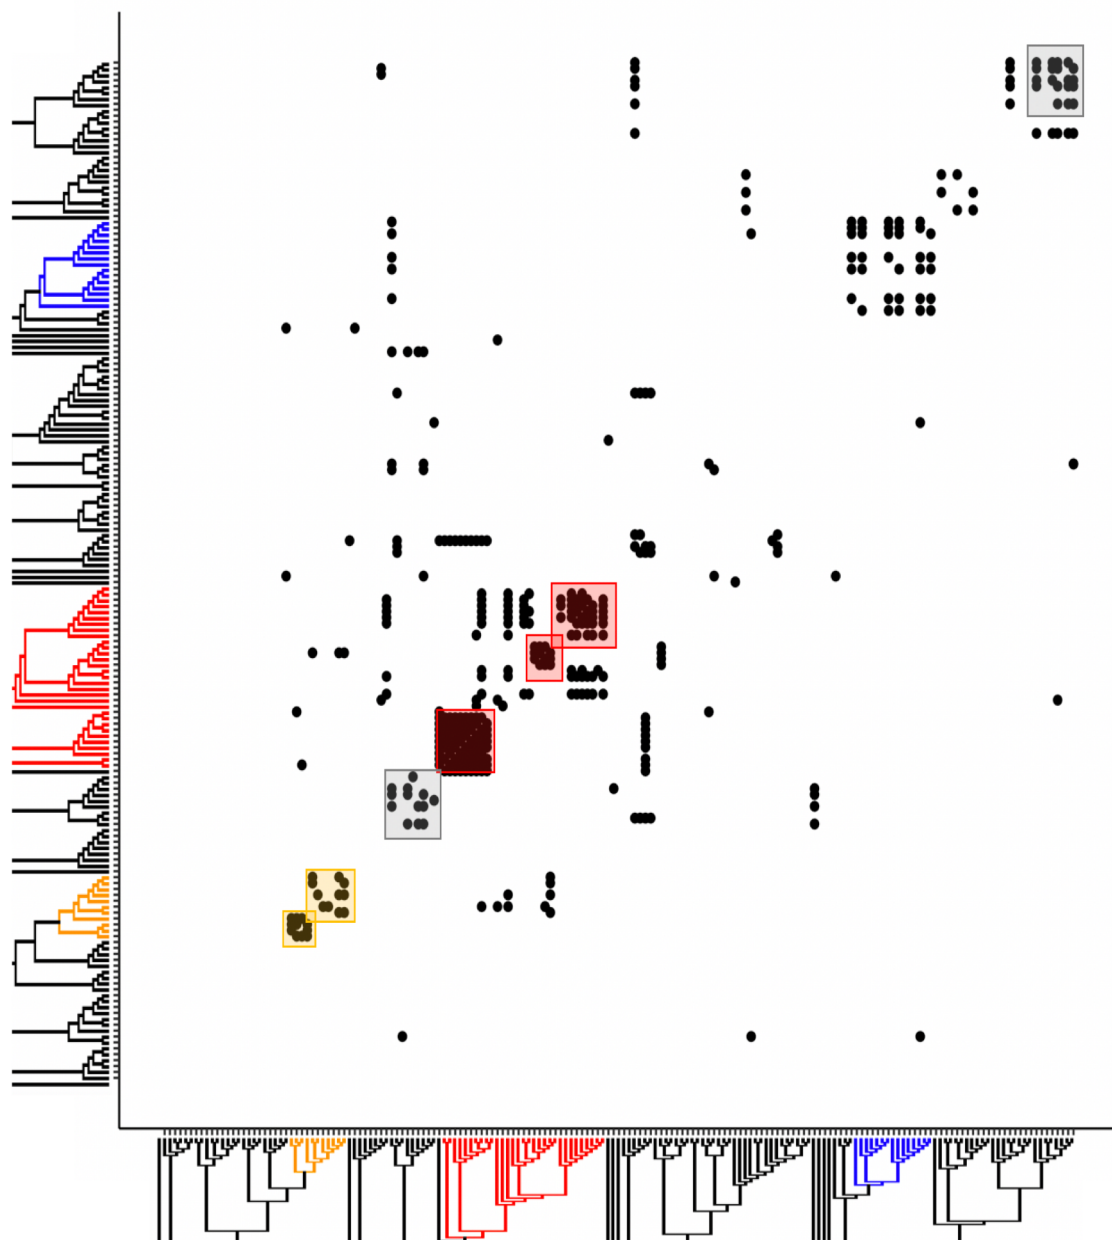

3-7 days with staff

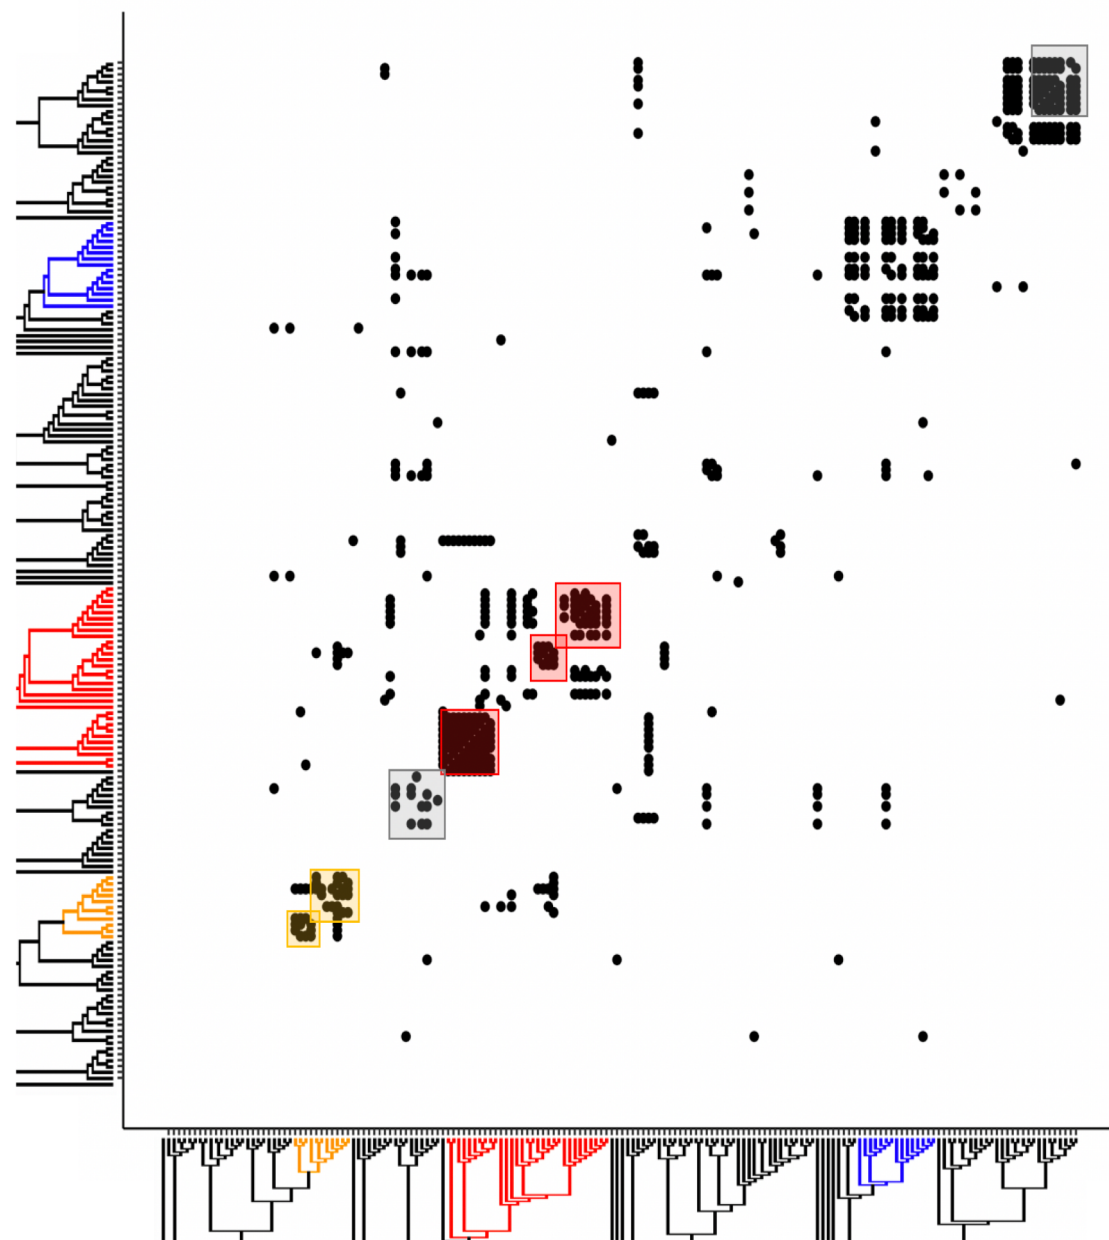

Supplement: supp [file elife-65453-supp-v1.zip]

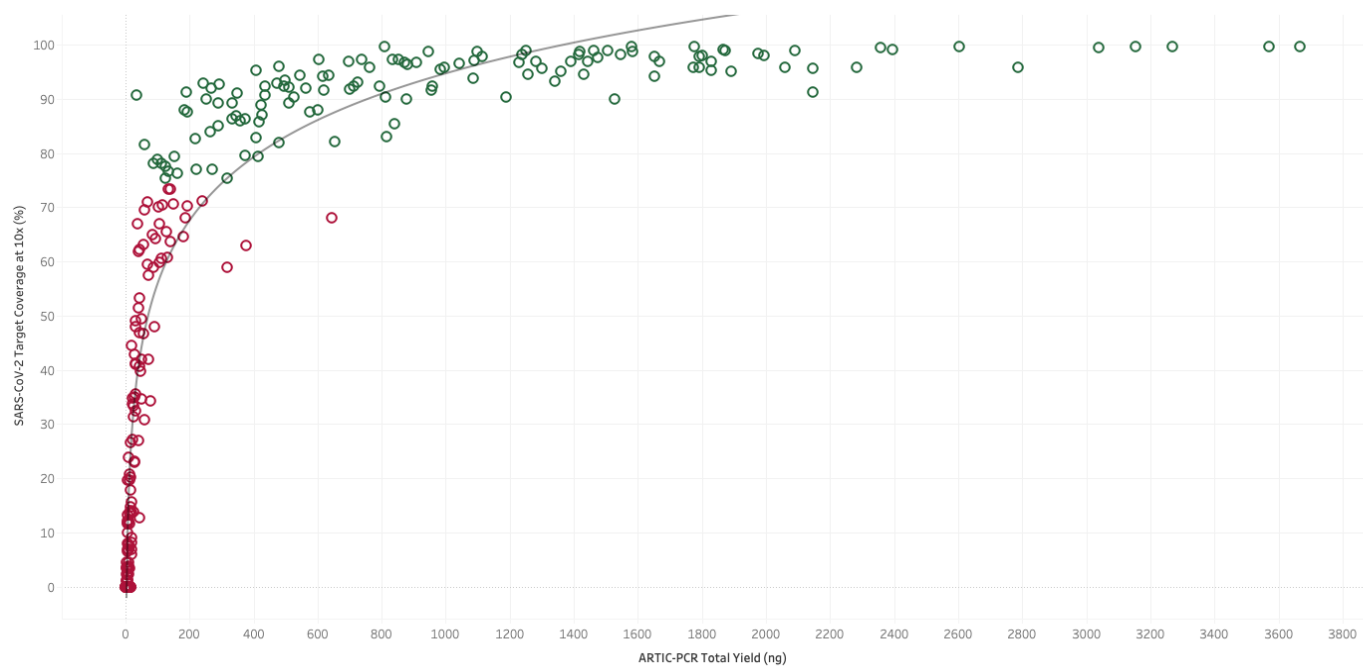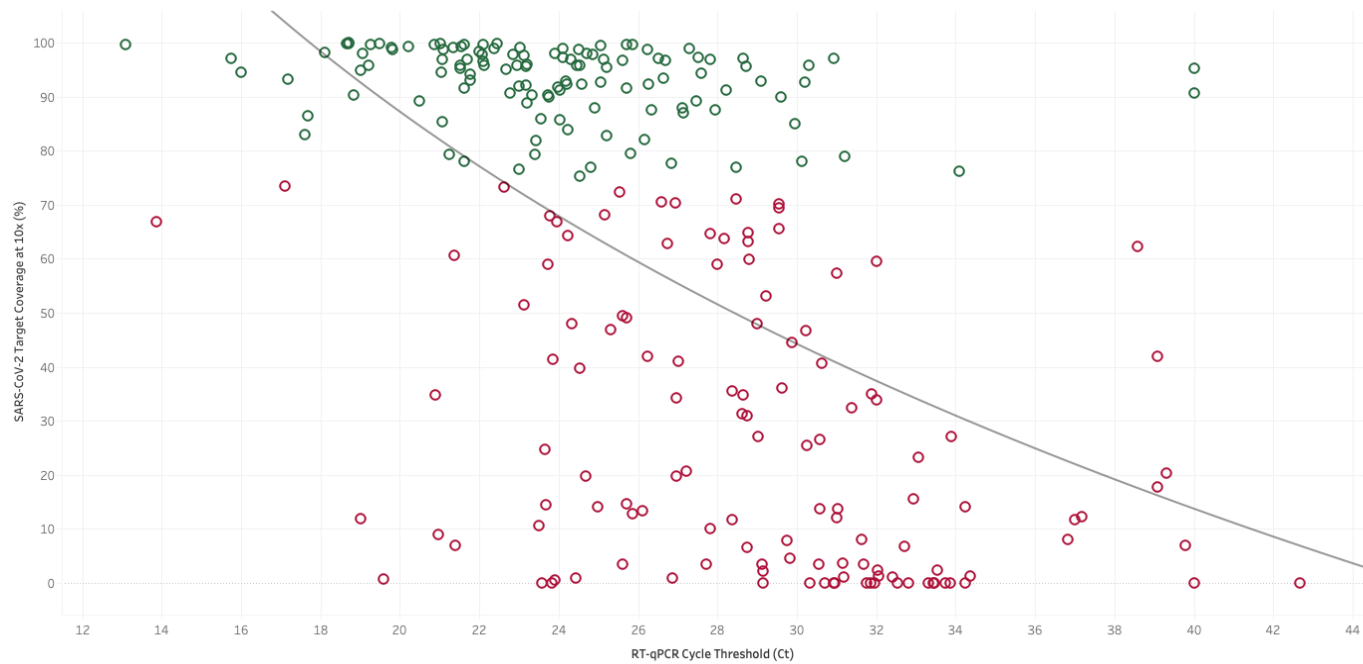

Supplement: supp [file elife-65453-supp-v1.zip › elife_poa_e65453_Figure_1_figure_supplement_1.pdf]

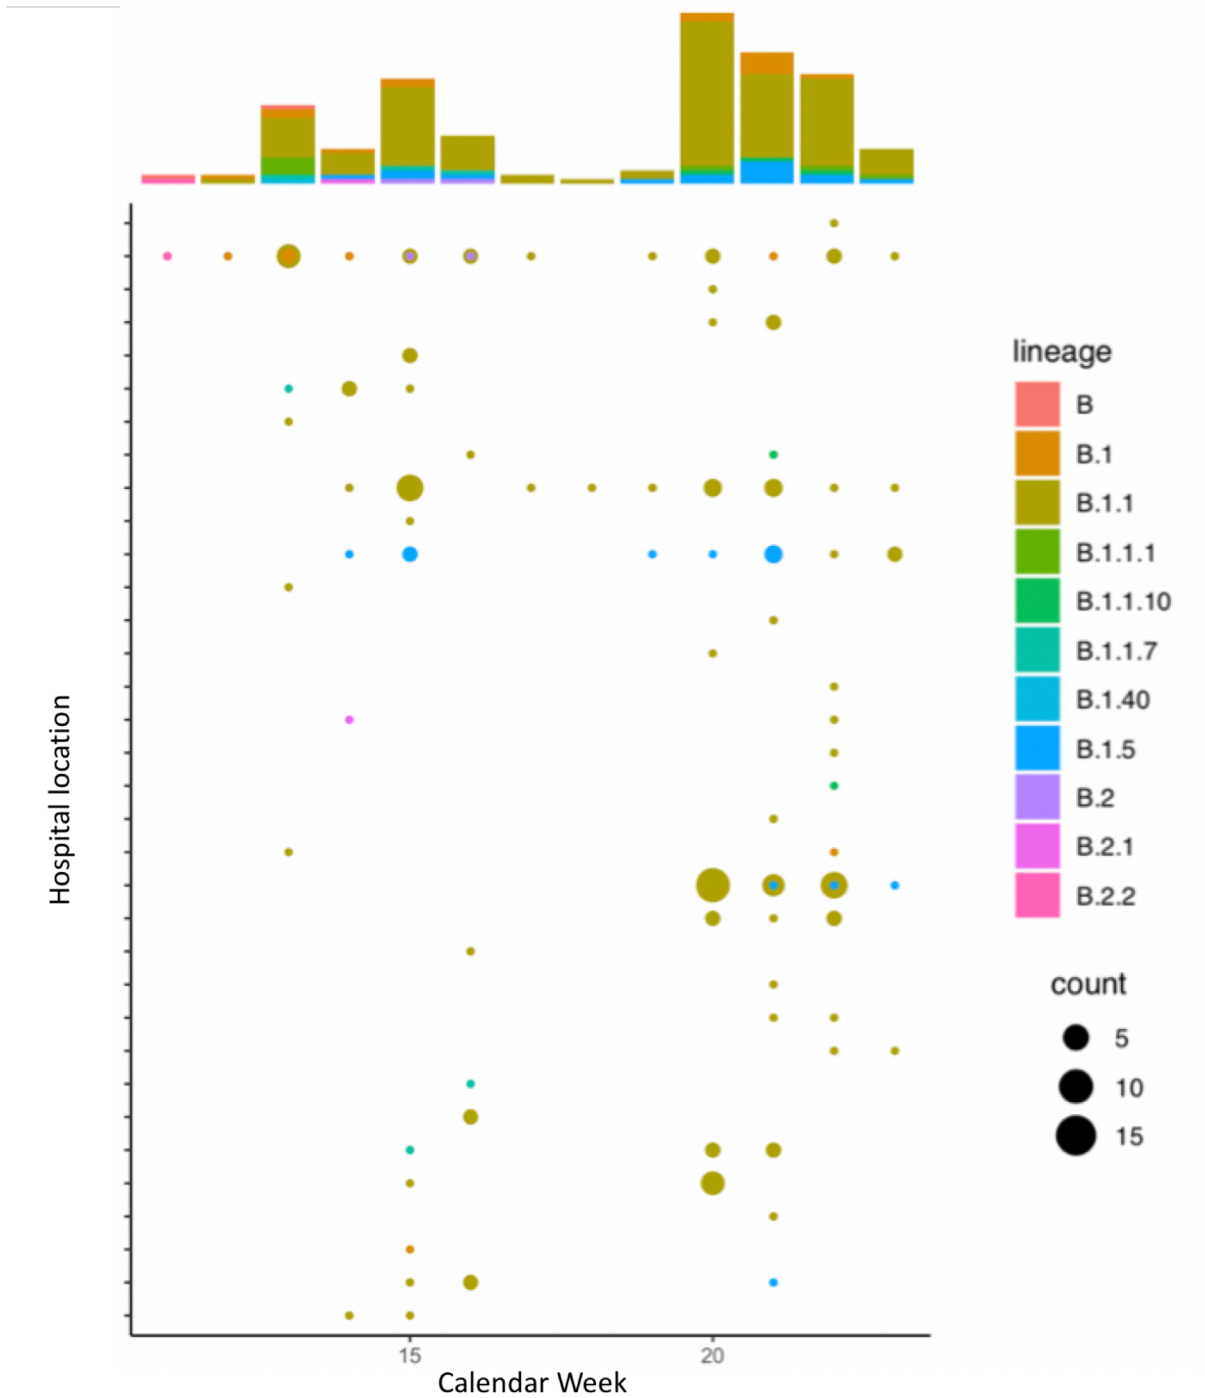

Supplement: supp [file elife-65453-supp-v1.zip › elife_poa_e65453_Figure_1_figure_supplement_2.pdf]

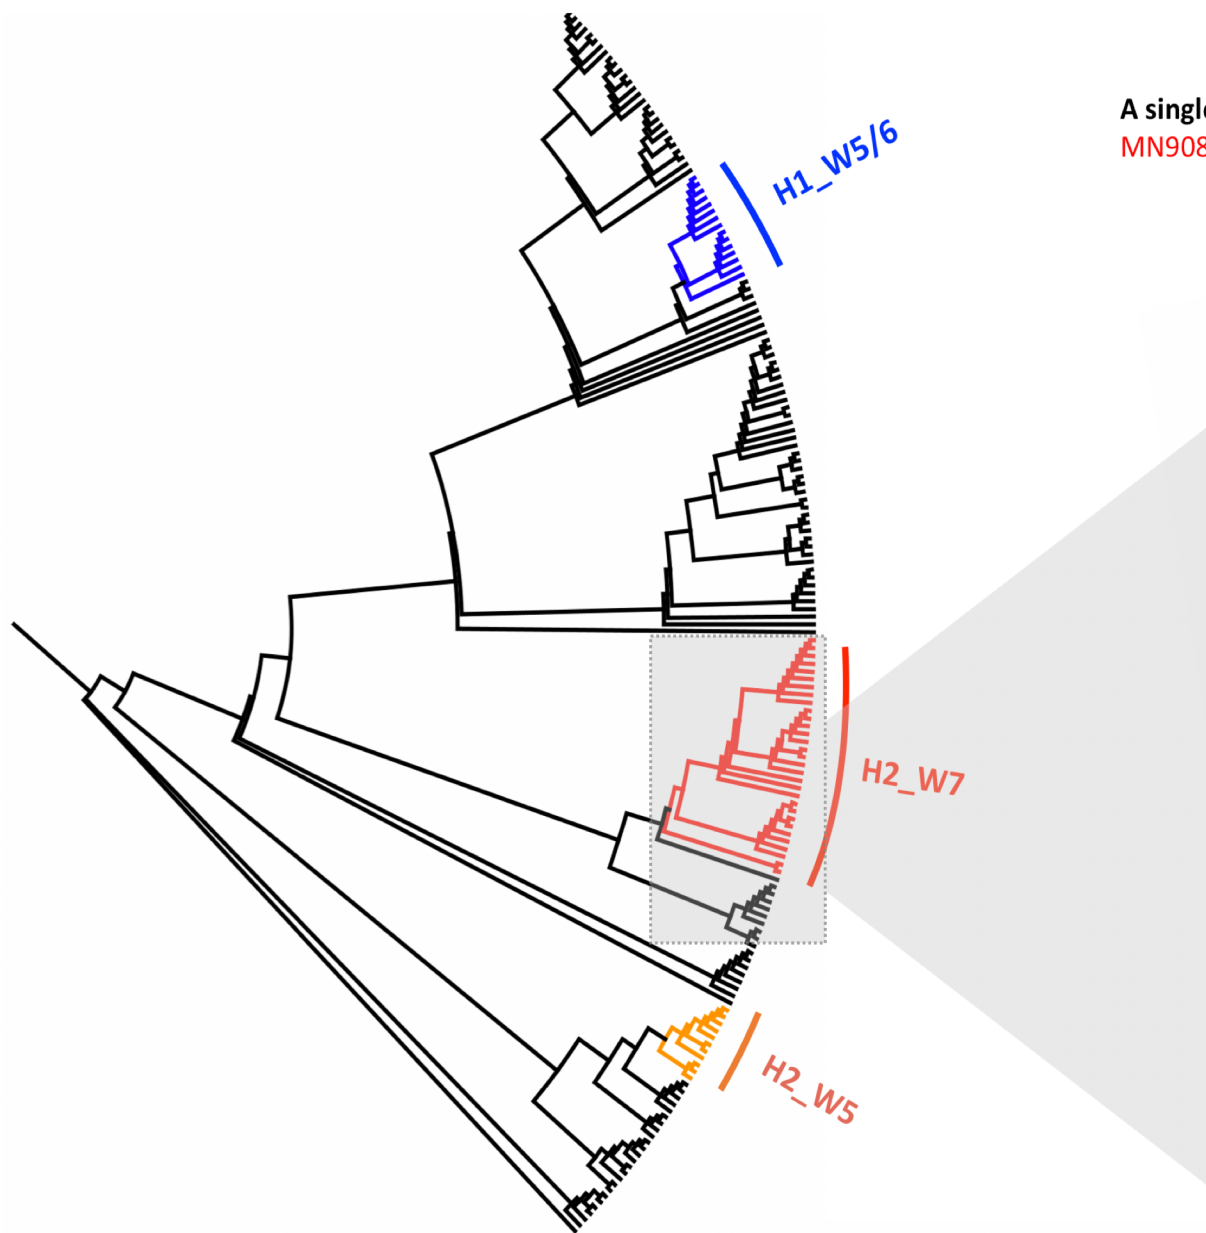

A single genetic change in the virus defines this subgroup:  
MN908947.3-3228-T-G (novel)

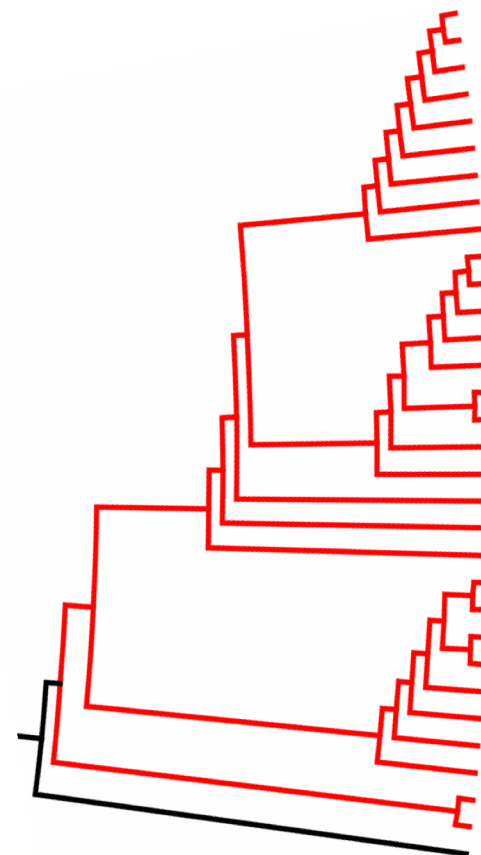

Supplement: supp [file elife-65453-supp-v1.zip › elife_poa_e65453_Figure_1_figure_supplement_3.pdf]
